# Supplementary material for: Overexpression of Suprabasin is Associated with Proliferation and Tumorigenicity of Esophageal Squamous Cell Carcinoma
Source: PubMed Central journal article supplement (PMC4761926; doi:10.1038/srep21549), 2016-02-22

**Overexpression of Suprabasin is Associated with Proliferation and  
Tumorigenicity of Esophageal Squamous Cell Carcinoma**

Jinrong Zhu<sup>1,2</sup>, Geyan Wu<sup>3</sup>, Qingyuan Li<sup>4</sup>, Hui Gong<sup>5</sup>, Junwei Song<sup>3</sup>, Lixue Cao<sup>3</sup>,  
Shu Wu<sup>2</sup>, Libing Song<sup>2</sup>, Lili Jiang<sup>1</sup>

Department of Pathophysiology, Guangzhou Medical University, Guangzhou, Guangdong 511436, China;

<sup>2</sup> Department of Experimental Research, State Key Laboratory of Oncology in Southern China, Sun Yat-sen University Cancer Centre, Guangzhou, 510060, China;

<sup>3</sup> Department of Biochemistry, Zhongshan School of Medicine, Sun Yat-sen University, Guangzhou, Guangdong 510080, China;

<sup>4</sup> Guangdong Country Garden School, Shunde, Foshan, Guangdong 528312, China;

<sup>5</sup> Central Laboratory, Nanshan Hospital, Guangdong Medical University, Shenzhen, Guangdong, 518052, China.

**Correspondence:** Lili Jiang, MD. Department of Pathophysiology, Guangzhou

Medical University, Guangzhou 511436; P.R. China. Phone: +86(20)37104123;

E-mail: [jianglili126@163.com](mailto:jianglili126@163.com)

## Supplementary figure legends

**Supplementary Figure 1. Suprabasin expression is increased in ESCC.** (a) IHC examination of suprabasin protein expression in paired ESCC and adjacent non-tumor tissue specimens. (b) Statistical analysis of the mean optical density (MOD) of suprabasin staining in paired ESCC and adjacent non-tumor tissue specimens. Bars represent the mean  $\pm$  SD of three independent experiments. \*  $P < 0.05$ .

**Supplementary Figure 2. Kaplan–Meier analysis of the correlation between suprabasin protein levels and survival in ESCC.** (a) Statistical significance of suprabasin expression in patients at clinical stages I and II (left) or III and IV (right). (b) Statistical significance of suprabasin expression in patients in T1–T2 (left) or T3–T4 (right) subgroups. (c) Statistical significance of suprabasin expression in patients in the lymph node–negative (left) or -positive (right) subgroups. (d) Kaplan–Meier curves of univariate analysis (log-rank) of overall survival for all patients with low versus high suprabasin expression, determined by MOD.  $P$ -values were calculated using the log-rank test.

**Supplementary Figure 3. Downregulation of suprabasin suppresses the tumorigenicity of ESCC cells *in vitro* and *in vivo*.** (a) Western blotting analysis of suprabasin expression in ESCC cell lines stably silencing suprabasin. (b) Downregulation of Suprabasin inhibits growth rate of ESCC cells, determined by MTT assay. (c) Quantification of colonies formed by the indicated cells as determined by colony formation assays. (d) Quantification of the BrdUrd incorporation assay in the indicated cells. (e) Quantification of colonies formed by the indicated cells, determined by anchorage-independent growth ability assays. (f) Representative images of the tumors from all mice in each group. (g) Tumor volumes were measured

on the indicated days. (h) Mean tumor weights of all mice in each group. Bars represent the mean  $\pm$  SD of three independent experiments. \*  $P < 0.05$ .

**Supplementary Figure 4. Suprabasin promotes cell proliferation of NEEC cells *in vitro*.** (a) Western blotting analysis of suprabasin expression in NEEC1 cell stably overexpressing suprabasin. (b) The growth rate of indicated cells, determined by MTT assay. (c) Quantification of colonies formed by the indicated cells as determined by colony formation assays. All experiments were performed with NEEC1 cells stably overexpressing suprabasin or vector control. Bars represent the mean  $\pm$  SD of three independent experiments. Bars represent the mean  $\pm$  SD of three independent experiments. \*  $P < 0.05$ .

**Supplementary Figure 5. GSK-3 $\beta$  is essential for the oncogenic active effect of suprabasin on Wnt/ $\beta$ -catenin activity in ESCC.** (a) Western blotting analysis of GSK-3 $\beta$  and phospho-GSK-3 $\beta$  in indicated cells. (b) Wnt/ $\beta$ -catenin signaling activity determined by luciferase assay of TCF/LEF transcriptional activity in the indicated cells, treated with BIO-A (GSK-3 $\beta$  inhibitor, 1 $\mu$ M) or vehicle control. (c) Cell viability determined by MTT assay in indicated cells, treated with BIO-A (1 $\mu$ M) or vehicle control. (d) Quantification of colonies formed by the indicated cells treated with BIO-A (1 $\mu$ M) or vehicle control, determined by anchorage-independent growth ability assays. Bars represent the mean  $\pm$  SD of three independent experiments. \*  $P < 0.05$ .

**Supplementary Figure 6. Suprabasin promotes angiogenesis of ESCC.** The IHC staining displaying that overexpression of suprabasin induced, whereas downregulation of suprabasin inhibited angiogenesis of ESCC *in vivo*, as indicated by the percentages CD31 (right). Bars represent the mean  $\pm$  SD of three independent

experiments. \*  $P < 0.05$ .

## Supplemental Tables

**Table 1. Clinicopathological characteristics of patient samples and suprabasin expression in ESCC**

|                           | Number of cases (%) |
|---------------------------|---------------------|
| <b>Gender</b>             |                     |
| Male                      | 128(75.3)           |
| Female                    | 42(24.7)            |
| <b>Age (years)</b>        |                     |
| ≤57                       | 88(51.8)            |
| >57                       | 82(48.2)            |
| <b>Smoking history</b>    |                     |
| Negative                  | 69(40.6)            |
| Positive                  | 101(59.4)           |
| <b>Clinical stage</b>     |                     |
| I                         | 10(5.9)             |
| IIa                       | 74(43.5)            |
| IIb                       | 15(8.8)             |
| III                       | 62(36.5)            |
| IV                        | 9(5.3)              |
| <b>T classification</b>   |                     |
| T1                        | 12(7.1)             |
| T2                        | 40(23.5)            |
| T3                        | 104(61.2)           |
| T4                        | 14(8.2)             |
| <b>N classification</b>   |                     |
| N0                        | 93(54.7)            |
| N1                        | 77(45.3)            |
| <b>M classification</b>   |                     |
| M0                        | 161(94.7)           |
| M1                        | 9(5.3)              |
| <b>Differentiation</b>    |                     |
| Well                      | 76(44.7)            |
| Moderate                  | 61(35.9)            |
| Poor                      | 33(19.4)            |
| <b>Treatment methods*</b> |                     |
| Resection                 | 45(26.5)            |
| CT/RT/CRT                 | 55(32.4)            |

---

|                                    |           |
|------------------------------------|-----------|
| Resection+CT/RT/CRT                | 70(41.2)  |
| <b>Vital status (at follow-up)</b> |           |
| Alive                              | 59(34.7)  |
| Death                              | 111(65.3) |
| <b>Expression of suprabasin</b>    |           |
| Low expression                     | 85(50.0)  |
| High expression                    | 85(40.0)  |

---

\* Resection: Endoscopic resection or esophagectomy; CT: Chemotherapy; RT: Radiotherapy; CRT: Chemoradiotherapy;

**Table 2. Correlation between suprabasin expression and clinicopathologic characteristics of ESCC**

|                         | Characteristic | Suprabasin           |                       | Chi-square test<br><i>P</i> -value |
|-------------------------|----------------|----------------------|-----------------------|------------------------------------|
|                         |                | Low<br>No. cases (%) | High<br>No. cases (%) |                                    |
| <b>Gender</b>           | Male           | 60(70.6)             | 68(80.0)              | 0.155                              |
|                         | Female         | 25(29.4)             | 17(20.0)              |                                    |
| <b>Age (years)</b>      | ≤ 57           | 44(51.8)             | 44(51.8)              | 1.000                              |
|                         | >57            | 41(48.2)             | 41(48.2)              |                                    |
| <b>Smoking history</b>  | Negative       | 33                   | 36                    | 0.338                              |
|                         | Positive       | 45                   | 66                    |                                    |
| <b>Clinical stage</b>   | I              | 8(9.4)               | 2(2.4)                | <0.0001                            |
|                         | IIa            | 60(70.6)             | 14(16.5)              |                                    |
|                         | IIb            | 3(3.5)               | 12(14.1)              |                                    |
|                         | III            | 13(15.3)             | 49(57.6)              |                                    |
|                         | IV             | 1(1.2)               | 8(9.4)                |                                    |
| <b>T classification</b> | T1             | 10(11.8)             | 2(2.4)                | <0.0001                            |
|                         | T2             | 26(30.6)             | 14(16.5)              |                                    |
|                         | T3             | 48(56.5)             | 56(65.9)              |                                    |
|                         | T4             | 1(1.2)               | 13(15.3)              |                                    |
| <b>N classification</b> | N0             | 69(81.2)             | 24(28.2)              | <0.0001                            |
|                         | N1             | 16(18.8)             | 61(71.8)              |                                    |
| <b>M classification</b> | M0             | 84(98.8)             | 77(90.6)              | 0.016                              |
|                         | M1             | 1(1.2)               | 8(9.4)                |                                    |
| <b>Differentiation</b>  | Well           | 59(69.4)             | 17(20.0)              | <0.0001                            |
|                         | Moderate       | 21(24.7)             | 40(47.1)              |                                    |
| <b>Vital status</b>     | Poor           | 5(5.9)               | 28(32.9)              | <0.0001                            |
|                         | Alive          | 46(54.1)             | 13(15.3)              |                                    |
|                         | Death          | 39(45.9)             | 72(84.7)              |                                    |

**Table 3. Spearman correlation analysis between suprabasin expression and clinical pathologic factors**

| <b>Variables</b>        | <b>Suprabasin expression level</b> |                       |
|-------------------------|------------------------------------|-----------------------|
|                         | <b>Spearman correlation</b>        | <b><i>P</i>-value</b> |
| <b>Gender</b>           | 0.001                              | 0.988                 |
| <b>Age</b>              | -0.109                             | 0.157                 |
| <b>Clinical stage</b>   | 0.575                              | <0.0001               |
| <b>T classification</b> | 0.325                              | <0.0001               |
| <b>N classification</b> | 0.532                              | <0.0001               |
| <b>M classification</b> | 0.068                              | 0.374                 |
| <b>Differentiation</b>  | 0.512                              | <0.0001               |
| <b>Tumor size</b>       | 0.183                              | 0.017                 |
| <b>Survival</b>         | -0.619                             | <0.0001               |
| <b>Vital status</b>     | 0.412                              | <0.0001               |



**Table 4. Univariate and multivariate analyses of various prognostic parameters  
in patients with ESCC Cox-regression analysis**

|                                 | <i>Univariate analysis</i> |                    | <i>Multivariate analysis</i> |               |                         |
|---------------------------------|----------------------------|--------------------|------------------------------|---------------|-------------------------|
|                                 | <i>P</i>                   | Relative risk (SE) | <i>P</i>                     | Relative risk | 95% confidence interval |
| <b>Gender</b>                   | 0.009                      | 0.523(0.247)       | 0.014                        | 0.537         | 0.327-0.881             |
| <b>Age</b>                      | 0.002                      | 1.029(0.009)       | 0.002                        | 1.031         | 1.012-1.052             |
| <b>Clinical stage</b>           | 0.003                      | 1.272(0.082)       | 0.001                        | 0.609         | 0.456-0.814             |
| <b>T classification</b>         | 0.002                      | 1.601(0.150)       | 0.194                        | 1.237         | 0.897-1.706             |
| <b>N classification</b>         | <0.001                     | 2.109(0.193)       | 0.053                        | 1.828         | 0.991-3.373             |
| <b>M classification</b>         | 0.603                      | 0.788(0.458)       | 0.616                        | 0.707         | 0.182-2.741             |
| <b>Differentiation</b>          | <0.001                     | 2.723(0.131)       | <0.001                       | 2.114         | 1.568-2.849             |
| <b>Tumor size</b>               | 0.029                      | 1.005(0.002)       | 0.4                          | 1.033         | 1.013-1.054             |
| <b>Expression of suprabasin</b> | <0.001                     | 4.295(0.204)       | <0.001                       | 4.709         | 2.658-8.342             |

**Table 5. Spearman correlation analysis between suprabasin expression  
(determined by MOD) and clinical pathologic factors**

| <b>Variables</b>        | <b>Suprabasin expression level</b> |                       |
|-------------------------|------------------------------------|-----------------------|
|                         | <b>Spearman correlation</b>        | <b><i>P</i>-value</b> |
| <b>Gender</b>           | 0.082                              | 0.289                 |
| <b>Age</b>              | -0.067                             | 0.386                 |
| <b>Clinical stage</b>   | 0.459                              | <0.001                |
| <b>T classification</b> | 0.362                              | <0.001                |
| <b>N classification</b> | 0.461                              | <0.001                |
| <b>M classification</b> | 0.079                              | 0.307                 |
| <b>Differentiation</b>  | 0.292                              | <0.001                |
| <b>Tumor size</b>       | 0.434                              | <0.001                |
| <b>Survival</b>         | -0.335                             | <0.001                |
| <b>Vital status</b>     | 0.259                              | 0.001                 |

**Table 6. Univariate and multivariate analyses of various prognostic parameters  
in patients with ESCC Cox-regression analysis**

**(Expression of suprabasin determined by MOD)**

|                                       | <i>Univariate analysis</i> |                    | <i>Multivariate analysis</i> |               |                         |
|---------------------------------------|----------------------------|--------------------|------------------------------|---------------|-------------------------|
|                                       | <i>P</i>                   | Relative risk (SE) | <i>P</i>                     | Relative risk | 95% confidence interval |
| <b>Gender</b>                         | 0.009                      | 0.523(0.247)       | 0.015                        | 0.660         | 0.399-1.091             |
| <b>Age</b>                            | 0.002                      | 1.029(0.009)       | 0.006                        | 1.028         | 1.008-1.049             |
| <b>Clinical stage</b>                 | 0.003                      | 1.272(0.082)       | 0.032                        | 0.789         | 0.489-1.273             |
| <b>T classification</b>               | 0.002                      | 1.601(0.150)       | 0.350                        | 1.199         | 0.820-1.753             |
| <b>N classification</b>               | <0.001                     | 2.109(0.193)       | 0.140                        | 1.974         | 0.800-4.870             |
| <b>M classification</b>               | 0.603                      | 0.788(0.458)       | 0.662                        | 0.749         | 0.206-2.730             |
| <b>Differentiation</b>                | <0.001                     | 2.723(0.131)       | <0.001                       | 2.555         | 1.942-3.362             |
| <b>Tumor size</b>                     | 0.029                      | 1.005(0.002)       | 0.382                        | 1.003         | 0.997-1.009             |
| <b>Expression of suprabasin (MOD)</b> | <0.001                     | 2.200(0.195)       | 0.030                        | 1.633         | 1.048-2.545             |

Supplementary Figure 1

a

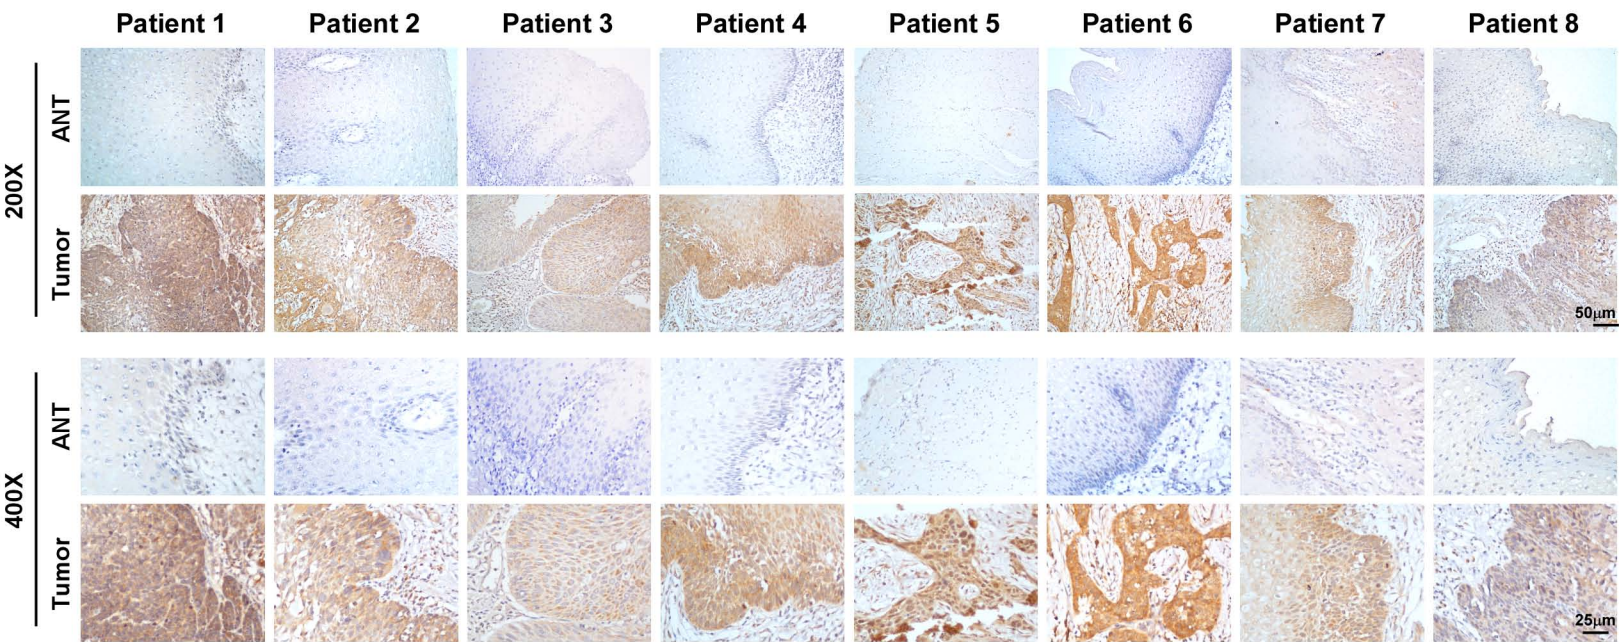

b

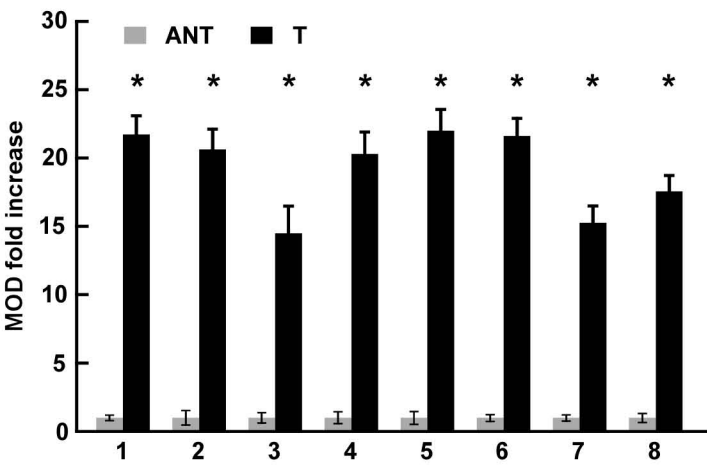

a

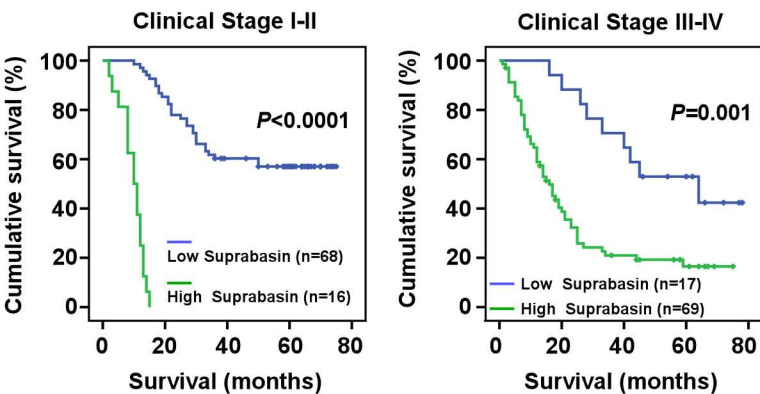

b

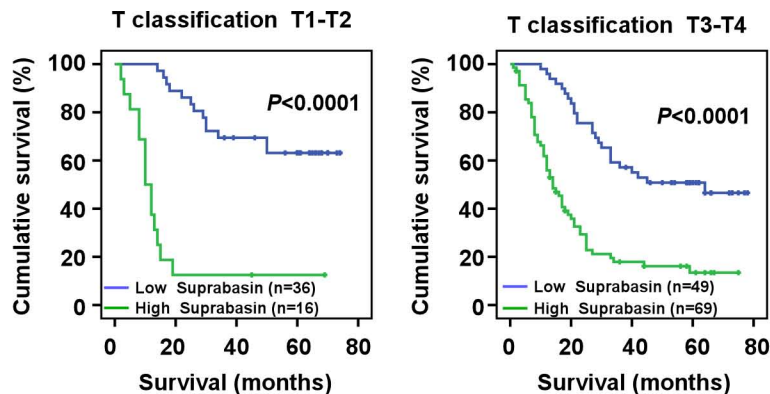

c

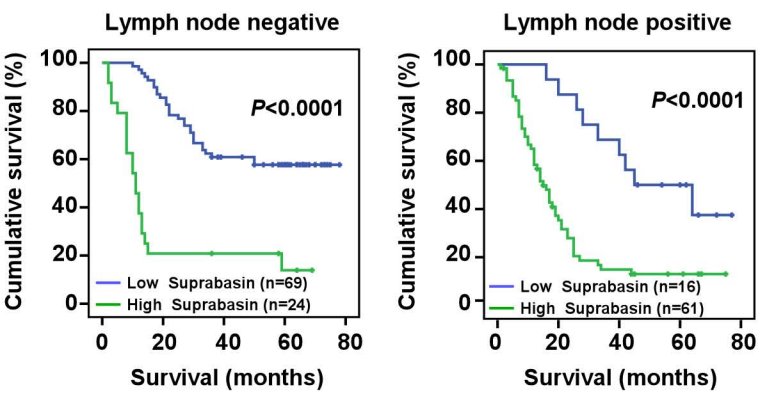

d

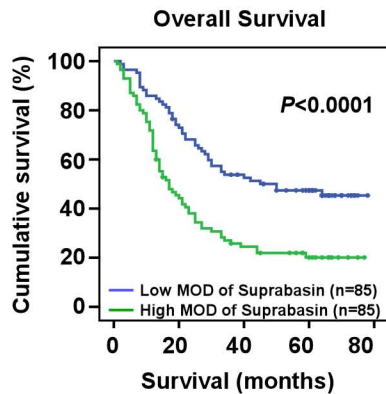

a

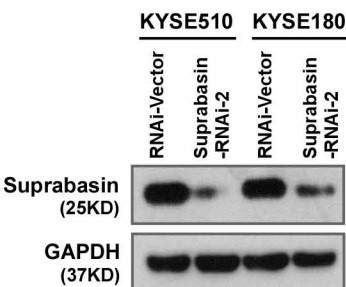

b

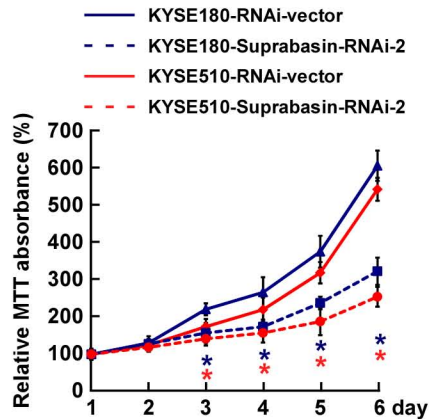

c

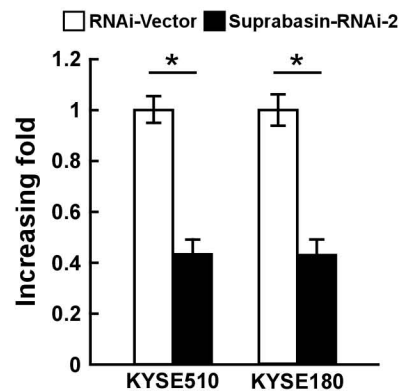

d

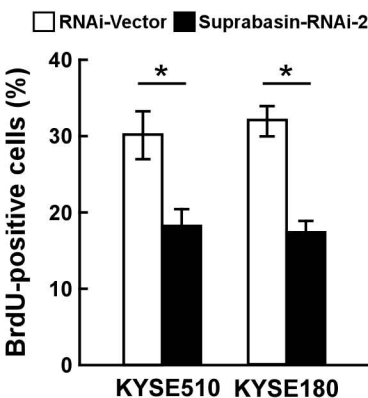

e

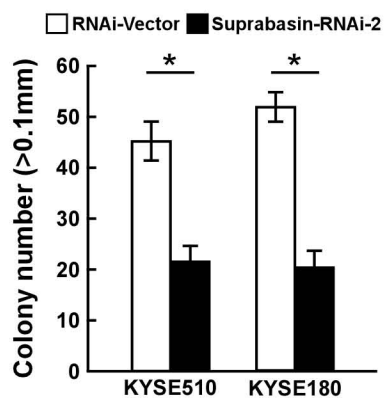

f

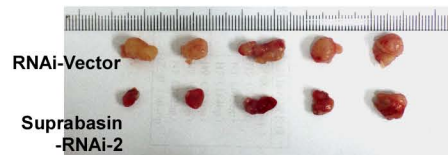

g

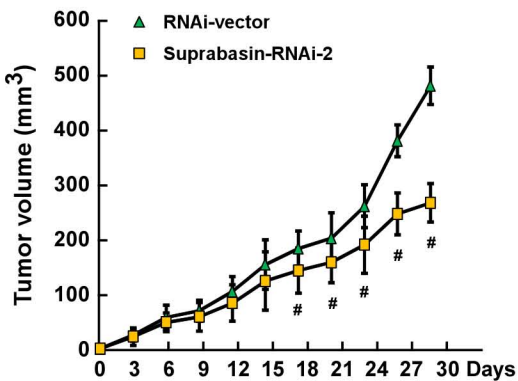

h

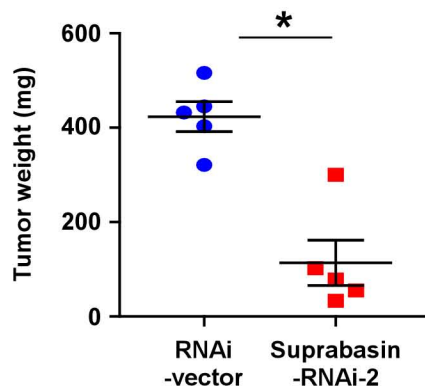

# Supplementary Figure 4

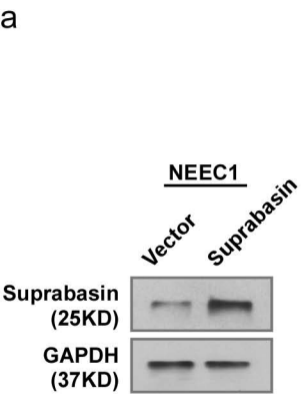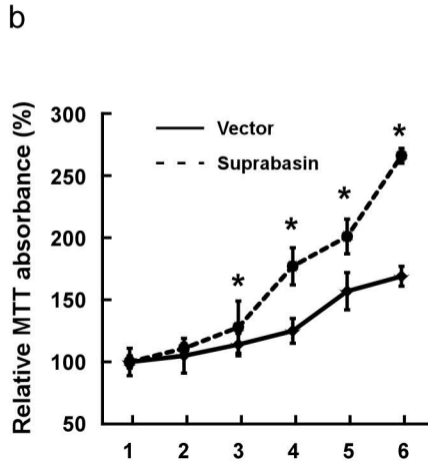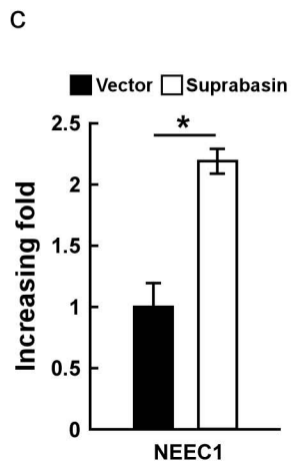

a

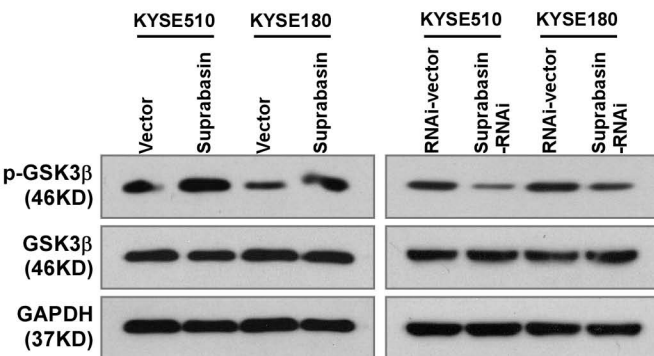

b

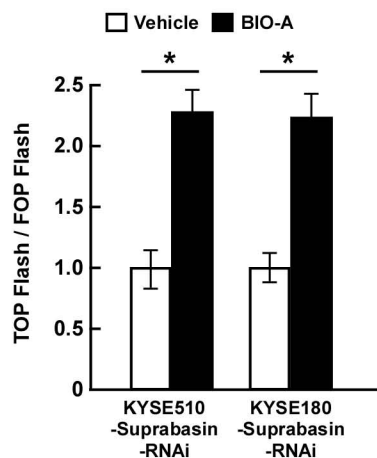

c

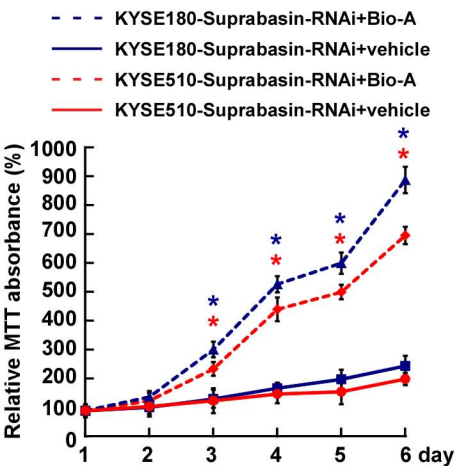

d

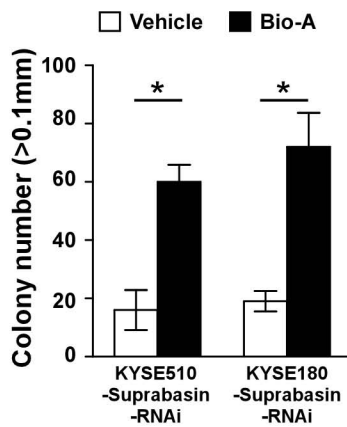



# Supplementary Figure 6

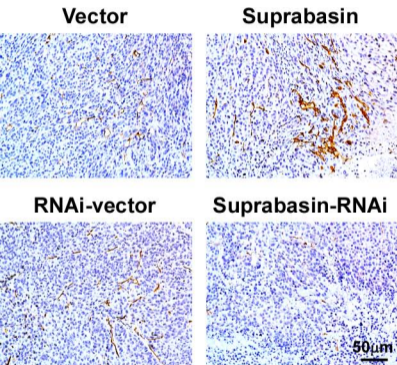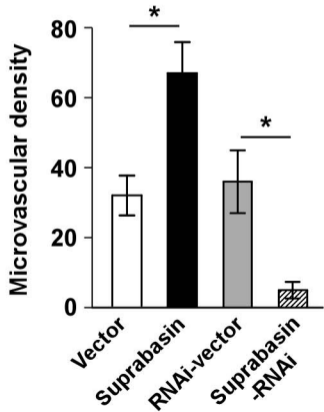

Supplement: srep21549-s1.pdf [file srep21549-s1.pdf]
